# Supplementary material
Source: publisher figshare collection journal article supplement (https://gsajournals.figshare.com/ndownloader/files/22603415)
Supplement: Supplementary file 1 [file 22603415]

## Sheet: Sheet2
Table S1: Summary statitics of RNA-seq sequencing, mapping and gene read counts. The bolded library was a previously sequenced G. hirsutum var. yucatanense 10 dpa fiber sample (SRX062250).
Accession	Status	Stage	Total Reads Sequenced	Total Reads Mapped	Total Coding Reads	AT Coding Reads	DT Coding Reads
CRB252	Dom	5 dpa	55901222	52890140	19656544	9623973	10032571
		10 dpa	29258894	27825915	10440615	5120169	5320446
		15 dpa	33262075	31614808	11777189	5768112	6009077
		20 dpa	34011731	30363850	11478997	5732263	5746734
Maxxa	Dom	5 dpa	44718091	42464091	15892094	7723781	8168313
		10dpa	29367962	27017661	10040583	4933497	5107086
		15 dpa	31686165	20519165	7356773	3635382	3721391
		20 dpa	5539104	2288437	864837	440826	424011
TM-1	Dom	5 dpa	38014167	36151971	13443793	6593740	6850053
		10 dpa	20985382	19989895	7464153	3681456	3782697
		15 dpa	29554346	27040779	10116872	4965178	5151694
		20 dpa	29510081	26116653	9824471	4832783	4991688
var. yucatanense	Wild	5 dpa	27776650	20553908	7272897	3590323	3682574
		10 dpa	29318675	27506399	10033985	5013185	5020800
		10 dpa	16282320	15224622	10906980	5406412	5500568
		15 dpa	26232665	24383837	8815079	4403285	4411794
		20 dpa	38162310	7819240	2293628	1137897	1155731
TX 665	Wild	5 dpa	29684989	22962967	8311319	4087015	4224304
		10 dpa	29511233	20351291	7293986	3588812	3705174
		15 dpa	37612622	35525706	13101674	6396135	6705539
		20 dpa	27953610	24314308	9067078	4484549	4582529
TX 2095	Wild	5 dpa	31797359	26200732	9357464	4591086	4766378
		10 dpa	26439223	24757758	8966075	4361536	4604539
		15 dpa	33681294	30476318	11124041	5550605	5573436
		20 dpa	35291246	29144819	10564456	5285810	5278646
